# Supplementary material for: Ciprofloxacin-Loaded Zein/Hyaluronic Acid Nanoparticles for Ocular Mucosa Delivery
Source: MDPI journal article supplement (doi:10.3390/pharmaceutics14081557), 2022-07-27
Supplement: s1 [file s1]

# Ciprofloxacin-Loaded Zein/Hyaluronic Acid Nanoparticles for Ocular Mucosa Delivery

Telma A. Jacinto<sup>1,#</sup>, Breno Oliveira<sup>1,#</sup>, Sónia P. Miguel<sup>1,2</sup>, Maximiano P. Ribeiro<sup>1,2</sup> and Paula Coutinho<sup>1,2,\*</sup>

<sup>1</sup> CPIRN-UDI/IPG, Centro de Potencial e Inovação em Recursos Naturais, Unidade de Investigação para o Desenvolvimento do Interior do Instituto Politécnico da Guarda, Avenida Dr. Francisco de Sá Carneiro, No. 50, 6300-559 Guarda, Portugal; telmajacinto@ipg.pt (T.A.J.); Brennofcb@hotmail.com (B.O.) spmiguel@ipg.pt (S.P.M.); mribeiro@ipg.pt (M.P.R.)

<sup>2</sup> CICS-UBI, Centro de Investigação em Ciências da Saúde, Universidade da Beira Interior, Avenida Infante D. Henrique, 6200-506 Covilhã, Portugal;

\* Correspondence: coutinho@ipg.pt.

# Authors contributed equally to this work.

## Supplementary Information

### 3. Results and Discussion

#### 3.1. TGA and DSC Analysis

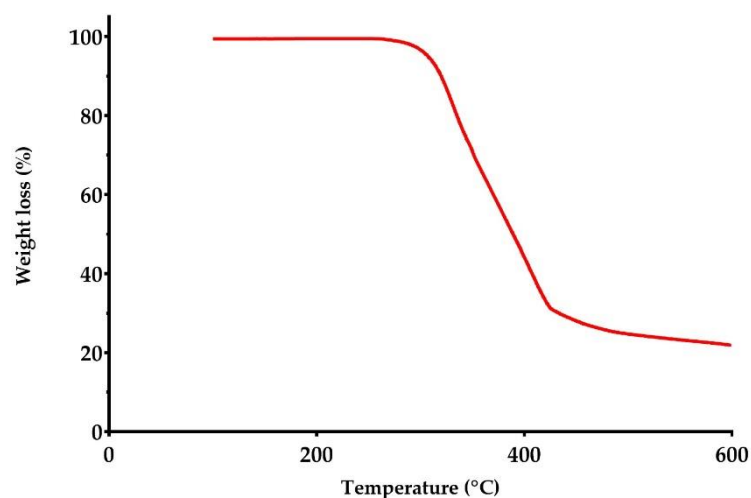

Figure S1. TGA analysis of ciprofloxacin.

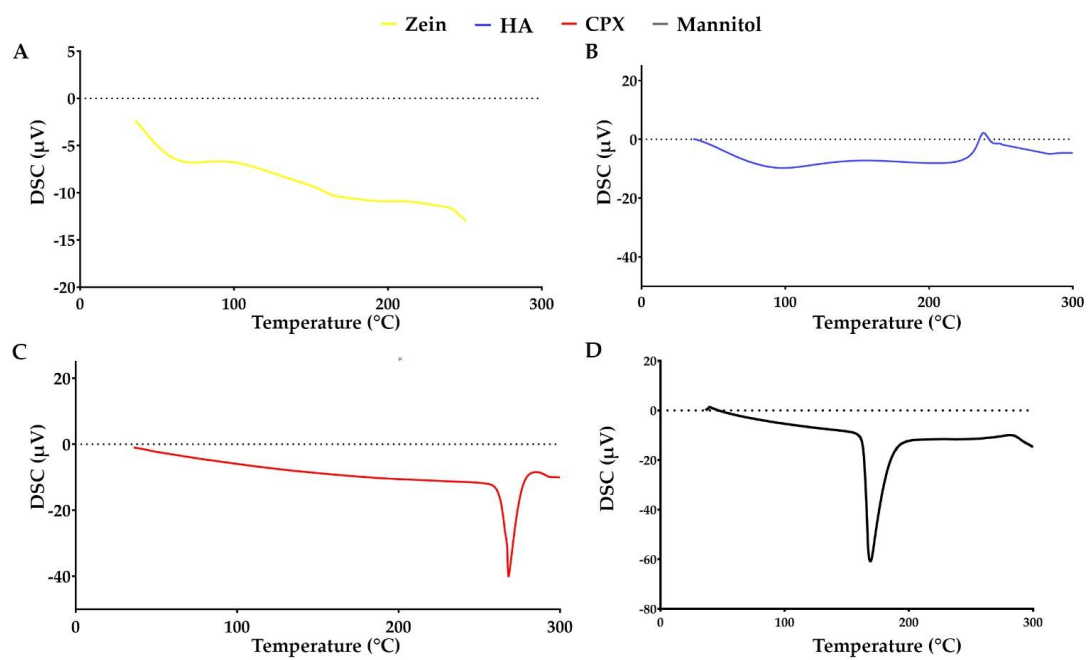

**Figure S2.** DSC thermograms of zein (A), hyaluronic acid (B), ciprofloxacin (C) and mannitol (D).
